# Supplementary material for: Regime shift in fish assemblage structure in the Yangtze River following construction of the Three Gorges Dam
Source: PubMed Central journal article supplement (PMC6414653; doi:10.1038/s41598-019-38993-x), 2019-03-12
Supplement: 41598_2019_38993_MOESM1_ESM.pdf [file 41598_2019_38993_MOESM1_ESM.pdf]

## **Supplementary Information**

### **Regime shift in fish assemblage structure in the Yangtze River following construction of the Three Gorges Dam**

Xin Gao<sup>1</sup>, Masami Fujiwara<sup>2</sup>, Kirk O. Winemiller<sup>2</sup>, Pengcheng Lin<sup>1</sup>, Mingzheng Li<sup>1</sup>,  
Huanzhang Liu<sup>1, \*</sup>

<sup>1</sup> Key Laboratory of Aquatic Biodiversity and Conservation of Chinese Academy of Sciences, Institute of Hydrobiology, Chinese Academy of Sciences, Wuhan, Hubei, China

<sup>2</sup> Department of Wildlife and Fisheries Sciences, Texas A&M University, College Station, TX, 77843-2258, USA.

\*Corresponding. [hzliu@ihb.ac.cn](mailto:hzliu@ihb.ac.cn)





|    |                                        |   |   |   |   |   |   |        |
|----|----------------------------------------|---|---|---|---|---|---|--------|
| 46 | <i>Pseudorasbora parva</i>             | + | + | + | + | + | + | 822    |
| 47 | <i>Sarcocheilichthys sinensis</i>      | + | + | + | + |   |   | 62     |
| 48 | <i>Sarcocheilichthys nigripinnis</i>   |   | + | + | + |   |   | 25     |
| 49 | <i>Gnathopogon herzensteini</i>        |   |   |   | + |   |   | 77     |
| 50 | <i>Gnathopogon imberbis</i>            | + |   |   | + |   |   | 41     |
| 51 | <i>Squalidus argentatus</i>            | + | + | + | + | + | + | 23087  |
| 52 | <i>Squalidus wolterstorffi</i>         | + | + |   |   |   |   | 22     |
| 53 | <i>Coreius heterodon</i>               | + | + | + | + | + | + | 27992  |
| 54 | <i>Coreius guichenoti</i>              | + | + | + | + | + | + | 137471 |
| 55 | <i>Rhinogobio typus</i>                | + | + | + | + | + | + | 5201   |
| 56 | <i>Rhinogobio cylindricus</i>          | + | + | + | + | + | + | 19920  |
| 57 | <i>Rhinogobio ventralis</i>            | + | + | + | + | + | + | 20219  |
| 58 | <i>Platysmacheilus exiguus</i>         |   | + |   |   |   |   | 1      |
| 59 | <i>Platysmacheilus nudiventris</i>     |   | + | + | + | + | + | 877    |
| 60 | <i>Abbottina rivularis</i>             | + | + | + | + | + | + | 576    |
| 61 | <i>Abbottina obtusirostris</i>         |   |   | + |   |   |   | 75     |
| 62 | <i>Microphysogobio kiatingensis</i>    | + | + |   | + |   |   | 582    |
| 63 | <i>Pseudogobio vaillanti</i>           | + | + |   | + |   |   | 38     |
| 64 | <i>Saurogobio dumerili</i>             |   |   | + |   |   |   | 21     |
| 65 | <i>Saurogobio dabryi</i>               | + | + | + | + | + | + | 33653  |
| 66 | <i>Saurogobio gymnocheilus</i>         | + | + | + | + | + |   | 2205   |
| 67 | <i>Gobiobotia (Gobiobotia) filifer</i> | + | + | + | + | + | + | 14117  |
| 68 | <i>Xenophysogobio boulengeri</i>       | + | + | + | + | + | + | 9675   |
| 69 | <i>Xenophysogobio nudicorpa</i>        |   | + |   | + | + | + | 437    |

|    |                                                 |   |   |   |   |   |   |      |
|----|-------------------------------------------------|---|---|---|---|---|---|------|
| 70 | <i>Rhodeus ocellatus</i>                        | + | + |   | + | + | + | 1070 |
| 71 | <i>Rhodeus fangi</i>                            |   | + |   |   |   |   | 84   |
| 72 | <i>Rhodeus sinensis</i>                         | + | + | + | + | + |   | 1053 |
| 73 | <i>Acheilognathus macropterus</i>               | + | + | + | + |   |   | 514  |
| 74 | <i>Acheilognathus omeiensis</i>                 | + |   |   | + |   |   | 4    |
| 75 | <i>Acheilognathus chankaensis</i>               |   | + |   |   |   |   | 12   |
| 76 | <i>Spinibarbus sinensis</i>                     | + | + | + | + |   | + | 563  |
| 77 | <i>Acrossocheilus monticolus</i>                |   | + |   | + |   |   | 4    |
| 78 | <i>Acrossocheilus yunnanensis</i>               |   |   |   | + |   |   | 1    |
| 79 | <i>Onychostoma sima</i>                         | + | + | + | + | + | + | 131  |
| 80 | <i>Bangana rendahli</i>                         | + | + | + |   |   |   | 10   |
| 81 | <i>Pseudogyrinocheilus procheilus</i>           | + | + |   | + | + | + | 21   |
| 82 | <i>Garra pingi pingi</i>                        | + |   | + | + | + | + | 103  |
| 83 | <i>Schizothorax (Schizothorax) chongi</i>       |   |   | + | + | + |   | 6    |
| 84 | <i>Schizothorax (Schizothorax) wangchiachii</i> |   |   |   | + |   | + | 5    |
| 85 | <i>Schizothorax (Schizothorax) prenanti</i>     |   |   |   |   | + |   | 7    |
| 86 | <i>Procypris rabaudi</i>                        | + | + | + | + | + | + | 418  |
| 87 | <i>Cyprinus (Cyprinus) carpio</i>               | + | + | + | + | + | + | 2386 |
| 88 | <i>Carassius auratus</i>                        | + | + | + | + | + | + | 5668 |
| 89 | <i>Lepturichthys fimbriata</i>                  | + | + | + | + | + | + | 4093 |
| 90 | <i>Jinshaia abbreviata</i>                      | + |   | + | + |   |   | 97   |
| 91 | <i>Jinshaia sinensis</i>                        | + | + | + | + | + | + | 4567 |
| 92 | <i>Sinogastromyzon sichangensis</i>             |   |   | + | + |   |   | 42   |



|     |                                   |   |   |   |   |   |   |   |   |      |
|-----|-----------------------------------|---|---|---|---|---|---|---|---|------|
| 116 | <i>Pseudobagrus ussuriensis</i>   |   |   | + |   | + |   |   |   | 108  |
| 117 | <i>Pseudobagrus pratti</i>        | + |   | + | + | + | + |   |   | 300  |
| 118 | <i>Pseudobagrus truncatus</i>     | + | + | + | + | + | + |   |   | 1107 |
| 119 | <i>Pseudobagrus emarginatus</i>   | + | + | + | + | + | + |   |   | 3097 |
| 120 | <i>Pseudobagrus brevicaudatus</i> | + |   | + |   | + |   |   |   | 13   |
| 121 | <i>Mystus macropterus</i>         | + | + | + | + | + | + |   |   | 696  |
| 122 | <i>Silurus asotus</i>             | + | + | + | + | + | + |   |   | 1121 |
| 123 | <i>Silurus meridionalis</i>       | + | + | + | + | + | + |   |   | 2493 |
| 124 | <i>Liobagrus marginatus</i>       |   | + | + | + | + | + |   |   | 304  |
| 125 | <i>Liobagrus nigricauda</i>       |   | + |   | + |   |   |   |   | 533  |
| 126 | <i>Liobagrus marginatoides</i>    |   |   | + | + | + |   |   |   | 206  |
| 127 | <i>Glyptothorax fokiensis</i>     | + | + | + | + | + | + |   |   | 1505 |
| 128 | <i>Glyptothorax sinensis</i>      | + | + | + | + | + | + |   |   | 2279 |
| 129 | <i>Clarias fuscus</i>             | + |   | + |   | + | + |   |   | 80   |
| 130 | <i>Clarias gariepinus</i>         |   |   |   | + |   |   |   | + | 1    |
| 131 | <i>Ictalurus punctatus</i>        |   |   | + | + |   |   | + | + | 12   |
| 132 | <i>Protosalanx chinensis</i>      |   | + |   | + |   |   |   | + | 78   |
| 133 | <i>Salangichthys tangkahkeii</i>  |   |   |   | + | + | + |   |   | 62   |
| 134 | <i>Hyporamphus intermedius</i>    | + | + |   | + |   |   |   |   | 8    |
| 135 | <i>Oryzias latipes</i>            |   |   |   | + | + |   |   |   | 4    |
| 136 | <i>Monopterus albus</i>           |   |   |   |   | + |   |   |   | 1    |
| 137 | <i>Siniperca chuatsi</i>          | + | + | + | + |   |   |   |   | 340  |
| 138 | <i>Siniperca scherzeri</i>        | + | + | + | + |   |   |   |   | 19   |
| 139 | <i>Siniperca kneri</i>            | + | + | + |   |   |   |   |   | 47   |

---

|     |                                  |   |   |   |   |   |   |   |      |
|-----|----------------------------------|---|---|---|---|---|---|---|------|
| 140 | <i>Channa argus</i>              |   | + |   | + |   |   |   | 4    |
| 141 | <i>Micropercops swinhonis</i>    |   | + | + | + | + |   |   | 44   |
| 142 | <i>Odontobutis obscurus</i>      |   | + |   | + |   |   |   | 8    |
| 143 | <i>Mugilogobius myxodermus</i>   |   |   |   | + |   |   |   | 32   |
| 144 | <i>Rhinogobius giurinus</i>      | + | + | + | + | + | + |   | 7893 |
| 145 | <i>Rhinogobius cliffordpopei</i> |   |   |   | + |   |   |   | 7    |
| 146 | <i>Rhinogobius brunneus</i>      |   | + |   | + |   |   |   | 73   |
| 147 | <i>Micropterus salmoides</i>     |   | + |   |   |   |   | + | 1    |
| 148 | <i>Oreochromis sp.</i>           |   | + |   | + |   |   | + | 6    |
| 149 | <i>Lucioperca lucioperca</i>     |   |   |   | + |   | + | + | 6    |
| 150 | <i>Piaractus brachypomus</i>     | + | + |   |   |   |   | + | 3    |

---
